# Activity of 25-Hydroxylase in Human Gingival Fibroblasts and Periodontal Ligament Cells

Kaining Liu, Huanxin Meng\*, Jianxia Hou

Department of Periodontology, Peking University School and Hospital of Stomatology, Beijing, China

## Abstract

**Background:** We previously demonstrated that 25-hydroxyvitamin D<sub>3</sub> concentrations in gingival crevicular fluid are 300 times higher than those in the plasma of patients with aggressive periodontitis. Here we explored whether 25-hydroxyvitamin D<sub>3</sub> can be synthesized by periodontal soft tissue cells. We also investigated which of the two main kinds of hydroxylases, CYP27A1 and CYP2R1, is the key 25-hydroxylase in periodontal soft tissue cells.

**Methodology/Principal Findings:** Primary cultures of human gingival fibroblasts and periodontal ligament cells from 5 individual donors were established. CYP27A1 mRNA, CYP2R1 mRNA and CYP27A1 protein were detected in human gingival fibroblasts and periodontal ligament cells, whereas CYP2R1 protein was not. After incubation with the 25-hydroxylase substrate vitamin D<sub>3</sub>, human gingival fibroblasts and periodontal ligament cells generated detectable 25-hydroxyvitamin D<sub>3</sub> that resulted in the production of 1 $\alpha$ ,25-dihydroxyvitamin D<sub>3</sub>. Specific knockdown of CYP27A1 in human gingival fibroblasts and periodontal ligament cells using siRNA resulted in a significant reduction in both 25-hydroxyvitamin D<sub>3</sub> and 1 $\alpha$ ,25-dihydroxyvitamin D<sub>3</sub> production. Knockdown of CYP2R1 did not significantly influence 25-hydroxyvitamin D<sub>3</sub> synthesis. Sodium butyrate did not influence significantly CYP27A1 mRNA expression; however, interleukin-1 $\beta$  and *Porphyromonas gingivalis* lipopolysaccharide strongly induced CYP27A1 mRNA expression in human gingival fibroblasts and periodontal ligament cells.

**Conclusions:** The activity of 25-hydroxylase was verified in human gingival fibroblasts and periodontal ligament cells, and CYP27A1 was identified as the key 25-hydroxylase in these cells.

**Citation:** Liu K, Meng H, Hou J (2012) Activity of 25-Hydroxylase in Human Gingival Fibroblasts and Periodontal Ligament Cells. PLoS ONE 7(12): e52053. doi:10.1371/journal.pone.0052053

**Editor:** Andrzej T. Slominski, University of Tennessee, United States of America

**Received:** September 13, 2012; **Accepted:** November 12, 2012; **Published:** December 12, 2012

**Copyright:** © 2012 Liu et al. This is an open-access article distributed under the terms of the Creative Commons Attribution License, which permits unrestricted use, distribution, and reproduction in any medium, provided the original author and source are credited.

**Funding:** This research was funded by National Natural Science Foundations of China (<http://www.nsf.gov.cn/Portal0/default152.htm>) (30772420, 81100749) and Beijing Natural Science Foundation (<http://www.bjkw.gov.cn/n1143/n1240/n1465/n2276/index.html>) (7102164). The funders had no role in study design, data collection and analysis, decision to publish, or preparation of the manuscript.

**Competing Interests:** The authors have declared that no competing interests exist.

\* E-mail: kqhxmeng@bjmu.edu.cn

## Introduction

Vitamin D plays an important role in the regulation of bone metabolism and immunological reactions [1,2]. In humans, vitamin D, in the form of vitamin D<sub>3</sub>, is derived from dietary sources or made from 7-dehydrocholesterol in the skin by exposure to ultraviolet rays [3,4,5,6,7]. Then, vitamin D<sub>3</sub> is metabolized by two-step hydroxylations: first 25-hydroxylation in the liver to form 25-hydroxyvitamin D<sub>3</sub> (25OHD<sub>3</sub>), the major circulating metabolite of vitamin D<sub>3</sub>, followed by 1 $\alpha$ -hydroxylation in the kidney to form 1 $\alpha$ ,25-dihydroxyvitamin D<sub>3</sub> (1,25OH<sub>2</sub>D<sub>3</sub>), the biologically active metabolite of vitamin D<sub>3</sub> [6,7].

In the early years of biochemical research, a mitochondrial cytochrome P450 (CYP27A1), an important enzyme in the bile acid synthesis pathway [8,9], was demonstrated to be 25-hydroxylase. Afterwards, Cheng et al. identified a microsomal cytochrome P450 (CYP2R1) with vitamin D 25-hydroxylase activity [10,11]. In addition, other cytochrome P450 enzymes, such as CYP2C11, CYP2D25, CYP3A4 and CYP2J2, were all identified as vitamin D 25-hydroxylases [12,13,14], and the two most active 25-hydroxylases were found to be CYP27A1 and

CYP2R1 [10]. It was reported that CYP27A1 was the more abundant 25-hydroxylase in the liver [10,15]. However, mutations in human and mouse genes encoding CYP27A1 protein influenced bile acid synthesis, but had no consequence on vitamin D metabolism [15,16,17,18]. Thus, the question as to which of these proteins is the key 25-hydroxylase in the liver remains controversial. In addition, it was reported that, besides the liver, there are extra-hepatic sites of 25OHD<sub>3</sub> synthesis, including the skin [7,19,20,21], prostate [22,23], macrophages [24,25,26], and endothelial cells [24].

Human gingival fibroblasts (hGF) and human periodontal ligament cells (hPDLC) are two kinds of periodontal fibroblasts and are important components of periodontal soft tissues. Our previous study demonstrated that local 25OHD<sub>3</sub> levels in gingival crevicular fluid were about 300 times higher than that in the plasma of patients with aggressive periodontitis [27,28]. Since there is abundant 25OHD<sub>3</sub> around periodontal soft tissues, it was hypothesized that hGF and hPDLC have 25-hydroxylase activity, and can synthesize 25OHD<sub>3</sub>. The objective of this study was to test this hypothesis.

## Results

CYP27A1 and CYP2R1 mRNA were detected in all the cells of the five donors, and no significant difference was found between the mRNA levels in hGF and hPDLC (Fig. 1). CYP27A1 protein was also detected in all cells of the five donors, whereas CYP2R1 was not detected, with the premise that anti-CYP2R1 antibody was able to recognize the protein in PC-3 cells, which were used as a positive control (Fig. 2). This indicated that CYP27A1 might be the key 25-hydroxylase in hGF and hPDLC.

After confirming the expression of 25-hydroxylase in hGF and hPDLC, the function of 25-hydroxylase was investigated. Whereas 1000 nM vitamin D<sub>3</sub> did not have a significant cytotoxic effect on any of the cells within 48 h, hGF and hPDLC generated 25OHD<sub>3</sub> in response to vitamin D<sub>3</sub> (Figs. 3A, B). The fact that extra- and intracellular 25OHD<sub>3</sub> was generated in the presence of vitamin D<sub>3</sub> provides direct and convincing evidence of the existence of 25-hydroxylase in hGF and hPDLC. At all time points, there was no significant difference in the levels of intracellular and extracellular 25OHD<sub>3</sub> between the two cell types.

Additionally, exposure to vitamin D<sub>3</sub> also resulted in the synthesis of 1,25OH<sub>2</sub>D<sub>3</sub> in hGF and hPDLC (Fig. 4). The observation that hGF and hPDLC could synthesize 1,25OH<sub>2</sub>D<sub>3</sub> when exposed to 25OHD<sub>3</sub> [29] is further evidence of 25-hydroxylase activity in hGF and hPDLC.

Based on the above direct evidence for 25-hydroxylase activity in hGF and hPDLC, we examined the effect of 25-hydroxylase knockdown. The efficiency of RNA interference against both CYP27A1 and CYP2R1 was both over 70% (Fig. 5). The generation of 25OHD<sub>3</sub> increased with increasing vitamin D<sub>3</sub> concentrations, but dropped significantly when CYP27A1 was knocked down using specific siRNA (Figs. 6A–D). However, knockdown of CYP2R1 did not significantly influence 25OHD<sub>3</sub> generation by hGF (Figs. 6A, C), and only slightly influenced 25OHD<sub>3</sub> generation by hPDLC (Figs. 6B, D). These results suggest that CYP27A1 might be the key 25-hydroxylase in hGF and hPDLC. In addition, knockdown of CYP27A1 resulted in a

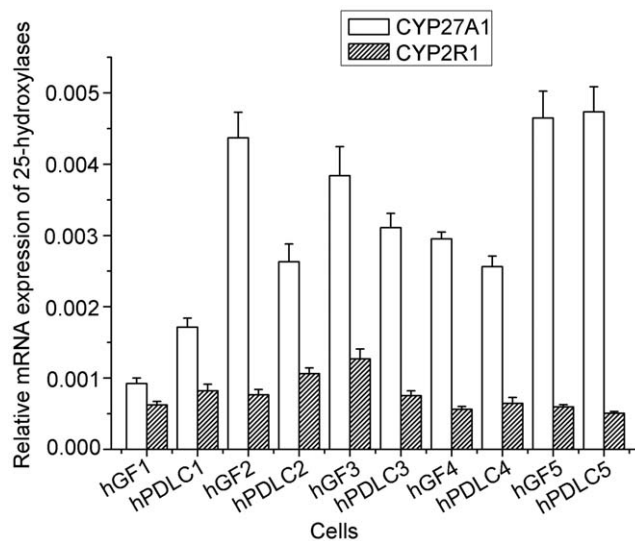

**Figure 1. Expression of CYP27A1 and CYP2R1 mRNA in hGF and hPDLC.** Expression of CYP27A1 mRNA was detected by real-time PCR in hGF and hPDLC from all five donors (donors are numbered 1–5). The expression levels of CYP27A1 and CYP2R1 mRNA were not significantly different in the two kinds of cells. The data are presented as the mean  $\pm$  SD.

doi:10.1371/journal.pone.0052053.g001

significant reduction of 1,25OH<sub>2</sub>D<sub>3</sub> generation (Figs. 7A–B). This is additional evidence for the activity of CYP27A1 as the 25-hydroxylase in hGF and hPDLC.

After the comprehensive confirmation of 25-hydroxylase activity in hGF and hPDLC, and the verification of CYP27A1 as the key 25-hydroxylase, the regulation of CYP27A1 in hGF and hPDLC was investigated. Interleukin-1 $\beta$  (IL-1 $\beta$ ) and *Porphyromonas gingivalis* lipopolysaccharide (*Pg*-LPS) strongly induced CYP27A1 expression (Fig. 8). Additionally, dose-dependent increases in expression of CYP27A1 mRNA in hGF and hPDLC following incubation with IL-1 $\beta$  or *Pg*-LPS were demonstrated (Fig. 8). By contrast, sodium butyrate did not influence significantly CYP27A1 mRNA expression in hGF and hPDLC (Fig. 8). In addition, no significant differences between hGF and hPDLC were observed in the regulation of CYP27A1.

## Discussion

In the present study, our hypothesis that hGF and hPDLC have 25-hydroxylase activity, and that they can synthesize 25OHD<sub>3</sub> was verified. Therefore, the origin of high 25OHD<sub>3</sub> concentrations in gingival crevicular fluid [27,28] might be hGF and hPDLC. Having demonstrated 1 $\alpha$ -hydroxylase activity in hGF and hPDLC [29], we could consider that the conversion of vitamin D<sub>3</sub> to 1,25OH<sub>2</sub>D<sub>3</sub> in hGF and hPDLC consisted of two steps: ① from vitamin D<sub>3</sub> to 25OHD<sub>3</sub>, under the action of 25-hydroxylase CYP27A1; ② from 25OHD<sub>3</sub> to 1,25OH<sub>2</sub>D<sub>3</sub>, under the action of 1 $\alpha$ -hydroxylase CYP27B1. This two-step conversion is similar to that observed in human keratinocytes [7,19,30,31,32]. In addition, Slominski et al. reported an alternate pathway of vitamin D<sub>3</sub> metabolism by cytochrome P450<sub>sc</sub> (CYP11A1) [33,34,35,36]. P450<sub>sc</sub> activity in hGF and hPDLC is worth further investigation in our future study.

We can then calculate and compare the amount of 1,25OH<sub>2</sub>D<sub>3</sub> synthesized from 1000 nM vitamin D<sub>3</sub> and from 1000 nM 25OHD<sub>3</sub>. According to the present study, the amount of 1,25OH<sub>2</sub>D<sub>3</sub> generated would be: ① In hGF exposed to 1000 nM vitamin D<sub>3</sub> for 48 h, 9 fmol/10000 cells in supernatants +14 fmol/10000 cells in cell lysates = 23 fmol/10000 cells (Fig. 4). ② In hPDLC exposed to 1000 nM vitamin D<sub>3</sub> for 48 h, 13 fmol/10000 cells in supernatants +16 fmol/10000 cells in cell lysates = 29 fmol/10000 cells (Fig. 4). According to our previous study [29], the amount of 1,25OH<sub>2</sub>D<sub>3</sub> generated would be the following: ③ In hGF exposed to 1000 nM 25OHD<sub>3</sub> for 48 h, 5 fmol/10000 cells in supernatants +13 fmol/10000 cells in cell lysates = 18 fmol/10000 cells. ④ In hPDLC exposed to 1000 nM 25OHD<sub>3</sub> for 48 h, 13 fmol/10000 cells in supernatants +14 fmol/10000 cells in cell lysates = 27 fmol/10000 cells. It is interesting that 1000 nM vitamin D<sub>3</sub> could induce hGF and hPDLC to generate even more 1,25OH<sub>2</sub>D<sub>3</sub> than 1000 nM 25OHD<sub>3</sub>. Particular attention should be paid to the observation that after 1000 nM vitamin D<sub>3</sub> treatment for 48 h, the 25OHD<sub>3</sub> concentration in the cell supernatants of hGF and hPDLC were only about 45 nM–64 nM and 30 nM–50 nM respectively, much lower than the added 1000 nM vitamin D<sub>3</sub>. So, why was less 25OHD<sub>3</sub> converted to more 1,25OH<sub>2</sub>D<sub>3</sub>? One reason might be that after vitamin D<sub>3</sub> treatment, 25OHD<sub>3</sub> is found not only in the supernatant, but also in the cell lysates, allowing intracellular 25OHD<sub>3</sub> to act directly as substrate of 1 $\alpha$ -hydroxylase. On the other hand, exogenous 25OHD<sub>3</sub> should enter the cells before eliciting a response. Thus, the direct availability at the site of action might be of great importance.

After comprehensive verification of 25-hydroxylase activity and the demonstration of CYP27A1 as the key 25-hydroxylase in hGF

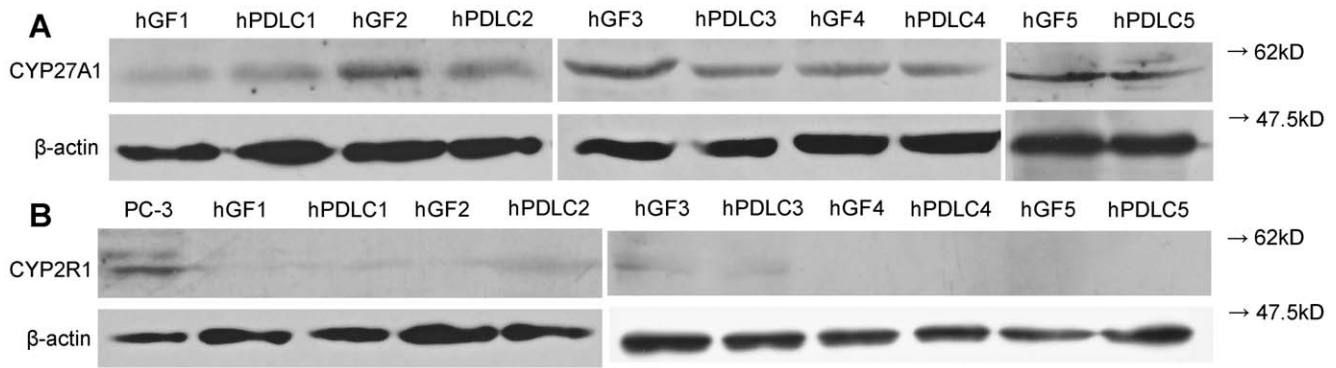

**Figure 2. Protein expression of CYP27A1 and CYP2R1 in hGF and hPDLC.** Protein expression of CYP27A1 was detected by Western blot in hGF and hPDLC from all five donors (donors are numbered 1–5). Protein expression of CYP2R1 was detected by Western blot in PC-3 cells, which were used as a positive control, but was not detected in hGF and hPDLC.  $\beta$ -actin was used as an internal control. doi:10.1371/journal.pone.0052053.g002

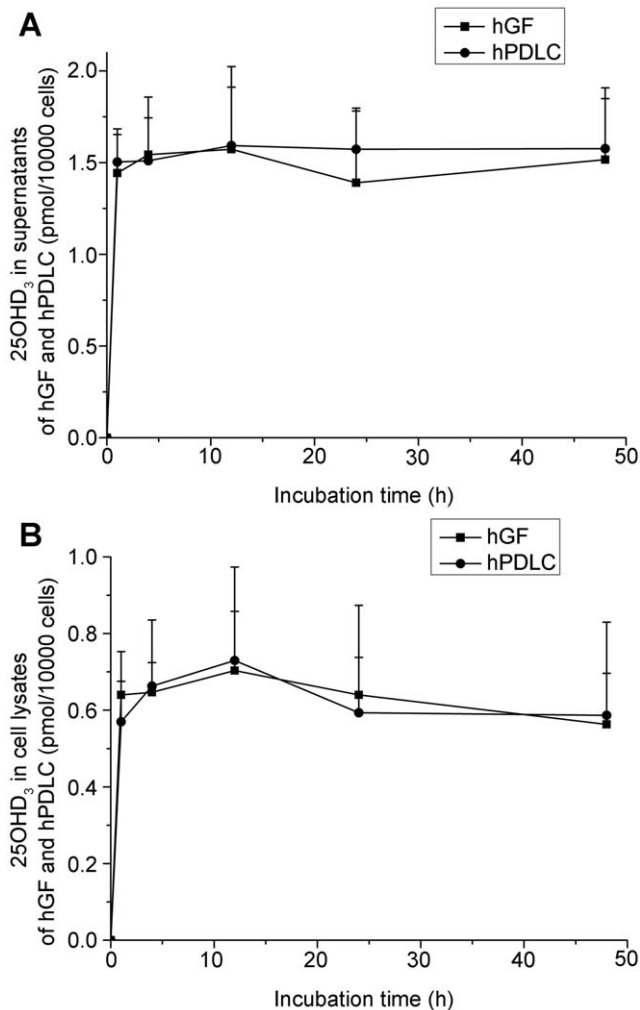

**Figure 3. Activity of 25-hydroxylases in hGF and hPDLC.** hGF and hPDLC from donors 2, 4 and 5 were incubated with 1000 nM vitamin D<sub>3</sub> for the times indicated, and the production of 25OH<sub>2</sub>D<sub>3</sub> was determined in supernatants(A) and cell lysates (B). After incubation, the production of 25OH<sub>2</sub>D<sub>3</sub> was detected. The amount of 25OH<sub>2</sub>D<sub>3</sub> generated was not significantly different between hGF and hPDLC. The data are presented as the mean  $\pm$  SE. doi:10.1371/journal.pone.0052053.g003

and hPDLC, the regulation of CYP27A1 in these cells was preliminarily investigated. IL-1 $\beta$  in gingival crevicular fluids of patients with periodontitis decreases significantly after initial periodontal therapy, indicating that IL-1 $\beta$  is associated with periodontitis [28]. *Porphyromonas gingivalis* is an important pathogen of periodontitis and butyrate is one of its metabolites [37]. It was demonstrated that the butyrate concentrations in gingival crevicular fluids of patients with periodontitis are significantly higher than those of healthy controls, and that butyrate concentrations in gingival crevicular fluids are significantly correlated with periodontal inflammation [38,39]. To investigate the regulation of CYP27A1 in hGF and hPDLC, IL-1 $\beta$ , *Pg*-LPS and sodium butyrate were chosen for the present study. It should be considered, however, that although stimuli with periodontal characteristics were used to simulate a periodontitis-like condition, this does not properly model the chronic disease situation *in vivo*, and can only help to investigate the regulation of CYP27A1 in hGF and hPDLC. The NF- $\kappa$ B activator, IL-1 $\beta$ , was demonstrated to be a potent up-regulator of CYP27A1 mRNA in hGF and hPDLC (Fig. 8). *Pg*-LPS could also up-regulate significantly the

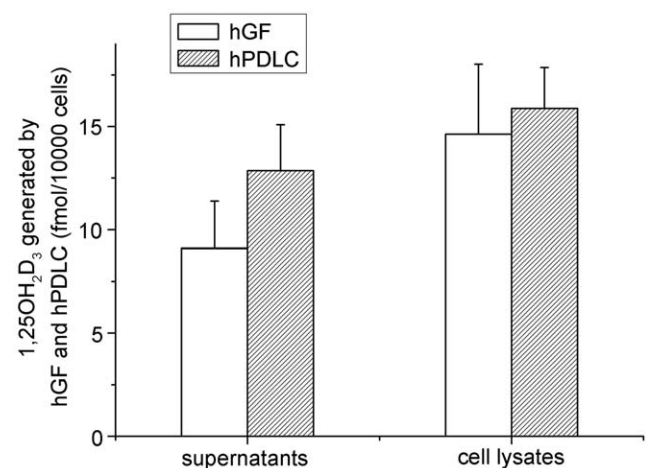

**Figure 4. 1,25OH<sub>2</sub>D<sub>3</sub> generation by hGF and hPDLC.** hGF and hPDLC from donors 2, 4 and 5 were incubated with 1000 nM vitamin D<sub>3</sub> for 48 h, and the production of 1,25OH<sub>2</sub>D<sub>3</sub> was determined in supernatants and cell lysates. The amount of 1,25OH<sub>2</sub>D<sub>3</sub> generated was not significantly different between hGF and hPDLC. The data are presented as the mean  $\pm$  SE. doi:10.1371/journal.pone.0052053.g004

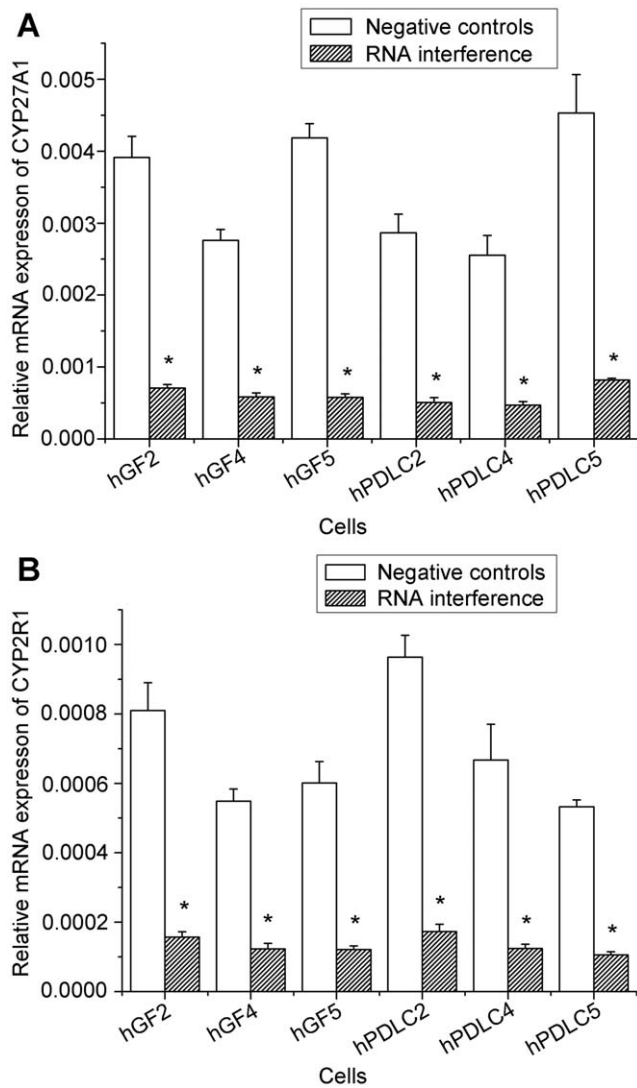

**Figure 5. The efficiency of RNA interference against CYP27A1 and CYP2R1.** hGF and hPDLC from donors 2, 4 and 5 were transfected with a siRNA oligonucleotide for CYP27B1, a siRNA oligonucleotide for CYP2R1, or a non-silencing control. Using real-time PCR as a measure, the efficiency of RNA interference against CYP27A1 and CYP2R1 was over 70% in hGF and hPDLC. The data are presented as the mean  $\pm$  SD. \* denotes difference from negative controls ( $p < 0.05$ ). doi:10.1371/journal.pone.0052053.g005

expression of CYP27A1 mRNA, whereas sodium butyrate could not. It was reported that *Pg*-LPS is the ligand of Toll-like receptor 2 (TLR2) and TLR4 [40,41] and that both hGF and hPDLC expressed TLR2 and TLR4 [42]. Upon ligand binding, TLR2 or TLR4-mediated signaling could activate signal transduction, leading to NF- $\kappa$ B activation [43,44]. Thus, NF- $\kappa$ B might be involved in the regulation of CYP27A1 expression, an observation that warrants further investigation.

Each donor supplied both hGF and hPDLC in the present study. Although hGF and hPDLC are two different kinds of cells, they shared many features in 25-hydroxylase expression, activity and regulation, and only subtle differences were detected. As shown in Fig. 6, when CYP2R1 was knocked down, 25OHD<sub>3</sub> generation by hGF was not changed significantly, whereas 25OHD<sub>3</sub> generation by hPDLC was affected slightly. However,

the difference did not affect our conclusion that CYP27A1 might be the key 25-hydroxylase in hGF and hPDLC.

Since 1,25OH<sub>2</sub>D<sub>3</sub> may enhance the antibacterial defense of human gingival epithelial cells [45] and hGF and hPDLC could synthesize 1,25OH<sub>2</sub>D<sub>3</sub> with 25OHD<sub>3</sub> [29], the confirmation of 25-hydroxylase activity in hGF and hPDLC implies that these cells could generate 25OHD<sub>3</sub> as a substrate for 1,25OH<sub>2</sub>D<sub>3</sub>. From this perspective, 25-hydroxylase activity in hGF and hPDLC may be involved in the innate immune defense of the oral cavity. Recently, it was reported that oral calcium and vitamin D supplementation have a positive effect on periodontal health [46,47]. However, topical application of vitamin D has not been reported. Since hGF and hPDLC have the ability to synthesize 25OHD<sub>3</sub> and then to synthesize 1,25OH<sub>2</sub>D<sub>3</sub>, the topical application of vitamin D<sub>3</sub> might fulfill the function of 1,25OH<sub>2</sub>D<sub>3</sub>. Thus, our data suggest a potential benefit of topical application of vitamin D<sub>3</sub> in periodontal therapy.

In conclusion, hGF and hPDLC were identified as new extra-hepatic sites of 25OHD<sub>3</sub> synthesis for the first time, and CYP27A1 might be the key 25-hydroxylase in these cells.

## Materials and Methods

### Ethics Statement

The study protocol was approved by the institutional review board of Peking University School and Hospital of Stomatology (PKUSSIRB-2011007) and written informed consent was obtained from each participant in accordance with the Declaration of Helsinki.

### Cell Culture

Primary culture of hGF and hPDLC was carried out according to our previous methods [29]. In brief, hPDLC were obtained from extracted third molars of 5 young healthy volunteers, and hGF was isolated from the gingiva of the same 5 donors. The periodontal ligament tissues attached to the middle third of the roots were curetted gently by a surgical scalpel, minced and placed in 24-well plates. Gingivae were also minced and transferred into 24-well plates. Tissue explants were cultured in Dulbecco's Modified Eagle's Medium (DMEM; Gibco, Grand Island, NY, USA) supplemented with 10% (v/v) fetal bovine serum (FBS; PAA, Coelbe, Germany), 100 U/mL penicillin G and 100  $\mu$ g/mL streptomycin. Cultures were maintained in a humidified atmosphere of 5% (v/v) CO<sub>2</sub> at 37°C. After reaching 80% confluence, hGF and hPDLC were digested with a mixture of 0.25% (w/v) trypsin and 0.02% (w/v) EDTA, and subcultured at a 1:3 ratio. DMEM without phenol red (Sigma, St. Louis, MO, USA), 10% (v/v) dextran-coated, charcoal-stripped FBS (DCC-FBS; TBD, Tianjin, China) and hGF and hPDLC of passage 4 were used in all the following experiments. All experiments were conducted in triplicate.

The prostate cancer cell line, PC-3 (American Type Culture Collection, Rockville, MD, USA), was cultured in RPMI 1640 (Gibco, Gaithersburg, MD, USA) supplemented with 10% (v/v) FBS (FBS; PAA, Coelbe, Germany) in a humidified atmosphere of 5% CO<sub>2</sub> at 37°C and was used when the cells were in the logarithmic phase and reached 80% confluence.

### Cytotoxicity Test of Vitamin D<sub>3</sub>

hGF and hPDLC of three donors were used in the cytotoxicity test. hGF and hPDLC in their logarithmic growth phase were plated into 96-well plates at a density of 3000 cells/well in DMEM with 10% DCC-FBS, and the medium was replaced by DMEM without DCC-FBS after 24 h. After another 24 h, the medium

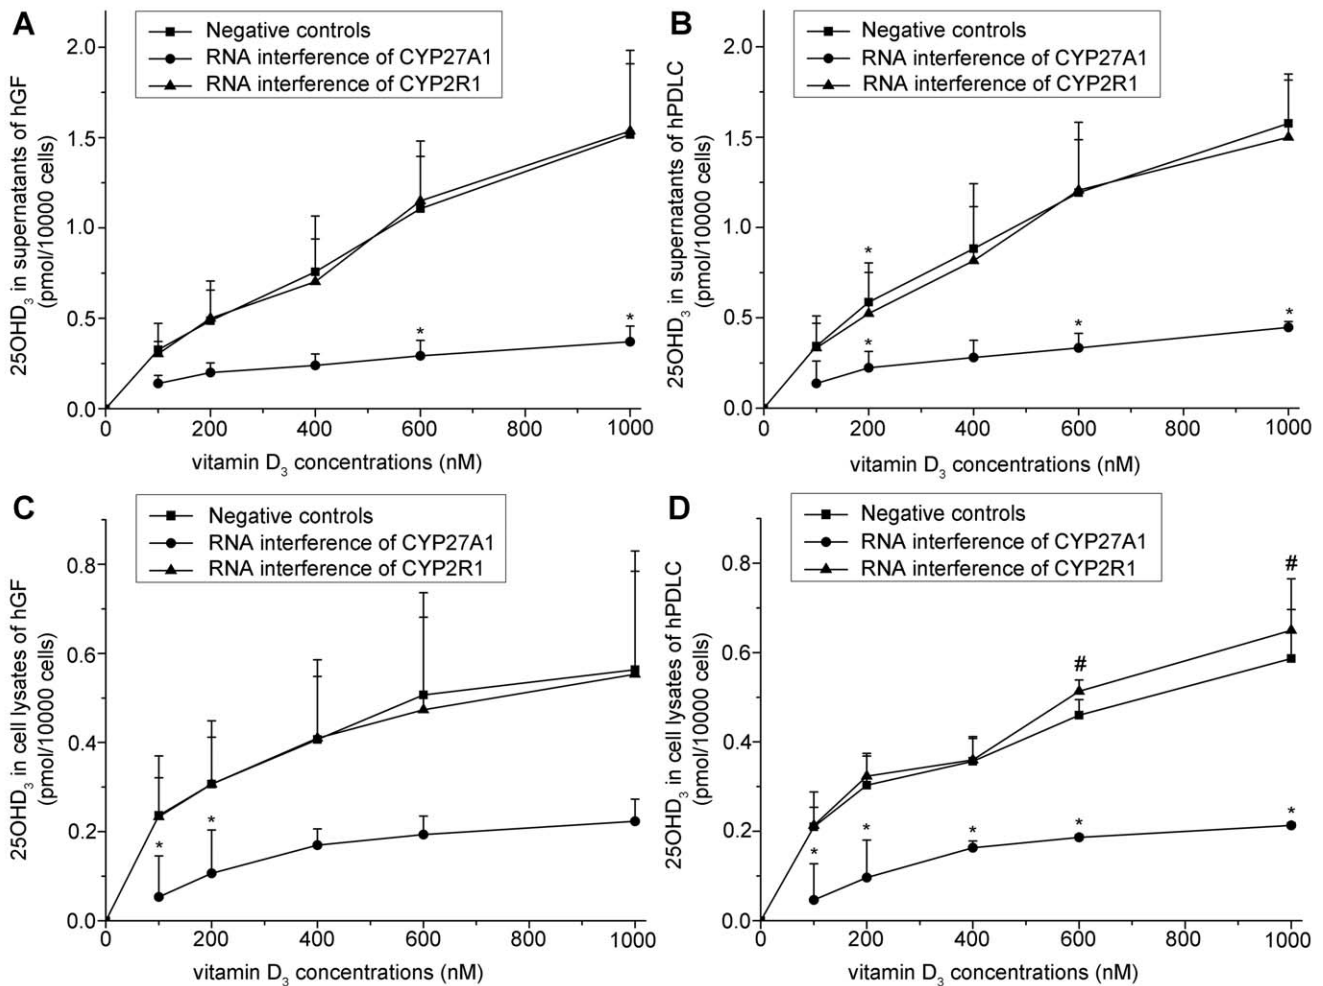

**Figure 6. Effect of knockdown of 25-hydroxylases on 25OHD<sub>3</sub> generation.** hGF and hPDLC from donors 2, 4 and 5 were treated with vitamin D<sub>3</sub> at various concentrations indicated in the figure for 12 h after transfection with a siRNA oligonucleotide for CYP27A1, a siRNA oligonucleotide for CYP2R1, or a non-silencing control. 25OHD<sub>3</sub> production was measured in supernatants of hGF (A), supernatants of hPDLC (B), cell lysates of hGF (C), and cell lysates of hPDLC (D). When CYP27A1 or CYP2R1 was not knocked down, the production of 25OHD<sub>3</sub> increased with an increasing concentration of 25OHD<sub>3</sub>. When CYP27A1 was knocked down in hGF and hPDLC, the generation of 25OHD<sub>3</sub> decreased significantly compared to when CYP27A1 was not knocked down. When CYP2R1 was knocked down in hGF (A, C), the generation of 25OHD<sub>3</sub> was not significantly different from that when CYP2R1 was not knocked down. When CYP2R1 was knocked down in hPDLC (B, D), the generation of 25OHD<sub>3</sub> was only slightly different at some time points from that when CYP2R1 was not knocked down. The data are presented as the mean  $\pm$  SE. \* hGF or hPDLC generated significantly less 25OHD<sub>3</sub> with the same amount of added vitamin D<sub>3</sub> when CYP27A1 or CYP2R1 was knocked down ( $p < 0.05$ ). # hGF or hPDLC generated significantly more 25OHD<sub>3</sub> with the same amount of added vitamin D<sub>3</sub> when CYP27A1 or CYP2R1 was knocked down ( $p < 0.05$ ). doi:10.1371/journal.pone.0052053.g006

was changed to DMEM with 10% DCC-FBS, and supplemented with 1000 nM vitamin D<sub>3</sub> or vehicle, respectively. The cytotoxicity test was carried out according to the Cell Counting Kit-8 protocol (CCK-8; Dojindo, Kumamoto, Japan). At hours 0, 24 and 48, cells were incubated with CCK-8 for the last 3 h of the culture period, after which the optical density values (OD values) were detected at 490 nm with a microplate reader (Bio-Rad Model 550, Hercules, CA, USA).

#### Detection of 25-hydroxylase Expression

hGF and hPDLC from all five donors were seeded into six-well plates at a density of 5000 cm<sup>-2</sup> in DMEM supplemented with 10% DCC-FBS. Four days later, a portion of the cells were harvested using Trizol agent (Dongsheng Biotech, Guangzhou, China). RNA was extracted using Trizol according to the manufacturer's instructions, and was reverse transcribed to cDNA

using a reverse transcription kit (Bio-Rad, Hercules, CA, USA). Real-time PCR reactions were accomplished using SYBR<sup>®</sup> Premix Ex Taq<sup>™</sup> II (TaKaRa Biotechnology, Dalian, China) in an ABI 7500 real-time Thermocycler (Applied Biosystems, Foster City, CA, USA). The data were analyzed using the SDS software, according to the manufacturer's instructions.

Glyceraldehyde-3-phosphate-dehydrogenase (GAPDH) was used as an internal control. Data were presented as relative mRNA levels calculated by the equation  $2^{-\Delta Ct}$  ( $\Delta Ct = Ct$  of target gene minus  $Ct$  of GAPDH) [48]. The primers used are listed in Table 1.

PC-3 cells and the remaining hGF and hPDLC were harvested using lysis buffer [20 mM Tris (pH 7.4), 150 mM NaCl, 1 mM EDTA, 1 mM EGTA, 1% (v/v) Triton X-100, 2.5 mM sodium pyrophosphate, 1 mM  $\beta$ -glycerol phosphate and 2 mM Na<sub>3</sub>VO<sub>4</sub> supplemented with a protease inhibitor cocktail (Roche, Mannheim, Germany)] [29] for Western blotting. The protein

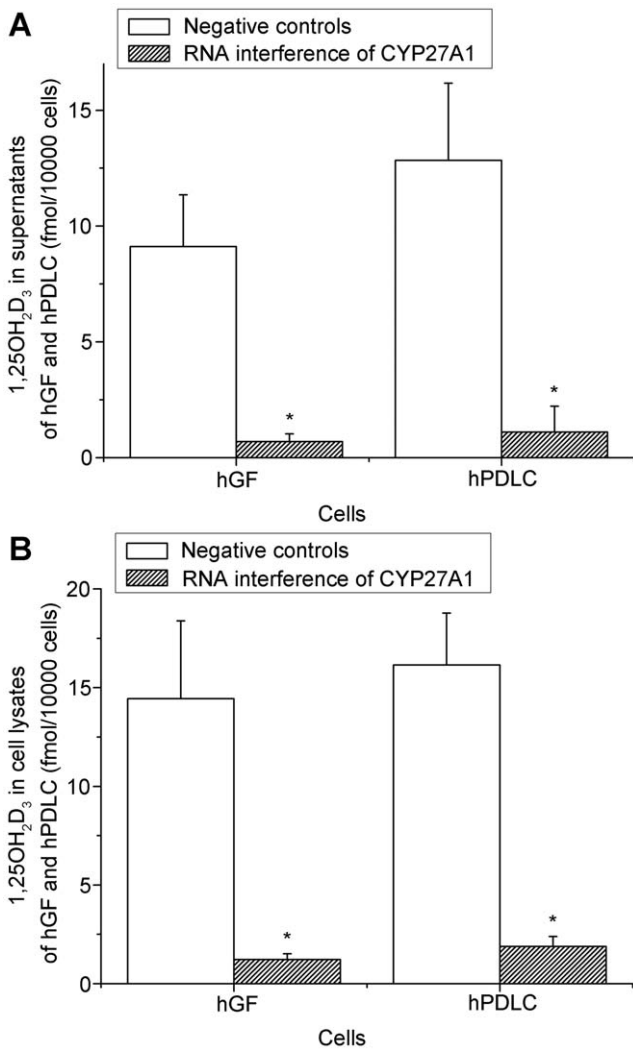

**Figure 7. The effect of 25-hydroxylase knockdown on 1,25OH<sub>2</sub>D<sub>3</sub> generation.** hGF and hPDLC from donors 2, 4 and 5 were treated with 1000 nM vitamin D<sub>3</sub> for 48 h after transfection with a siRNA oligonucleotide for CYP27A1 or a non-silencing control, and 1,25OH<sub>2</sub>D<sub>3</sub> production was measured in supernatants(A) and cell lysates (B). When CYP27A1 was knocked down, the generation of 1,25OH<sub>2</sub>D<sub>3</sub> decreased significantly compared to when CYP27A1 was not knocked down. The data are presented as the mean ± SE. \* hGF or hPDLC generated significantly less 1,25OH<sub>2</sub>D<sub>3</sub> with 1000 nM vitamin D<sub>3</sub> when CYP27A1 was knocked down ( $p < 0.05$ ). doi:10.1371/journal.pone.0052053.g007

concentration was determined using the Bicinchoninic Acid Protein Assay Kit (Applygen, Beijing, China). Twenty micrograms of total protein from each sample were loaded onto a gel comprising a 5% (w/v) stacking gel and a 10% (w/v) running gel. At the end of the electrophoresis, samples were transferred onto nitrocellulose blotting membranes (Hybond™; Amersham Pharmacia, Little Chalfont, UK). Blots were probed with a goat polyclonal antibody to CYP27A1 (diluted 1:200; Santa Cruz Biotechnology, Santa Cruz, CA, USA), a mouse polyclonal antibody to CYP2R1 (diluted 1:500; ABCAM, Cambridge, UK) or a mouse monoclonal antibody to β-actin (diluted 1:1000; Santa Cruz Biotechnology, Santa Cruz, CA, USA). After washing, blots were incubated with horseradish peroxidase-linked secondary antibody. The secondary antibodies against sheep (Kirkegaard & Perry Laboratories, Inc., Maryland, USA) and mouse (Beijing

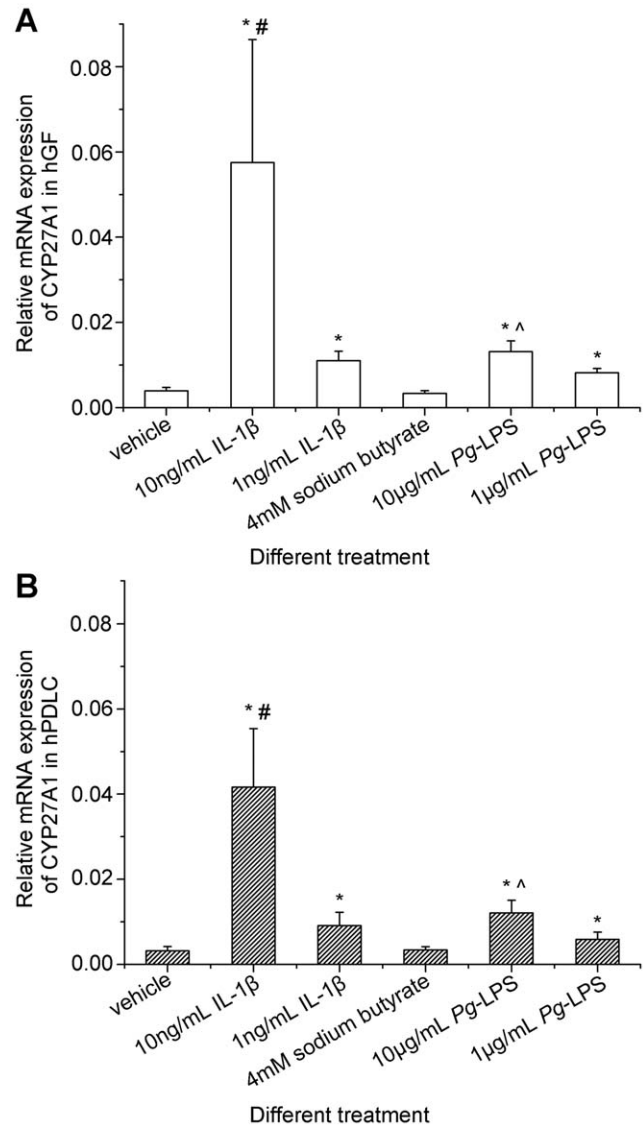

**Figure 8. Preliminary investigation of CYP27A1 regulation by inflammatory stimuli in hGF and hPDLC.** hGF and hPDLC from donors 2, 3, 4 and 5 were stimulated with different treatments indicated in the figure for 24 h, and CYP27A1 mRNA expression was determined by real-time PCR. IL-1β and Pg-LPS significantly up-regulated CYP27A1 mRNA expression and the higher dose of IL-1β or Pg-LPS raised higher CYP27A1 mRNA up-regulation in both hGF and hPDLC. Sodium butyrate did not significantly influence CYP27A1 mRNA expression. Additionally, the characteristics of CYP27A1 regulation in hGF and hPDLC were not significantly different. The data are presented as the mean ± SE. \* CYP27A1 mRNA expression was significantly different from that of the vehicle group ( $p < 0.05$ ). # CYP27A1 mRNA expression was significantly different from that of the 1 ng/mL IL-1β group ( $p < 0.05$ ). ^ CYP27A1 mRNA expression was significantly different from that of the 1 μg/mL Pg-LPS group ( $p < 0.05$ ). IL-1β : interleukin-1β. Pg-LPS: *Porphyromonas gingivalis* lipopolysaccharide. doi:10.1371/journal.pone.0052053.g008

Zhongshan Golden Bridge Biotechnology, Beijing, China) IgG were both diluted 1:2500. Antigen-antibody complexes were detected using the Enhanced Chemiluminescence reagent (Applygen, Beijing, China).

**Table 1.** Primer sequences used for PCR or real-time PCR.

| Target genes | Forward primer (5' →3') | Reverse primer (5' →3') | Products (bp) |
|--------------|-------------------------|-------------------------|---------------|
| CYP27A1      | GCTCTGGAGCAAGTGATG      | AGCATCCGTATAGAGCGC      | 196           |
| CYP2R1       | TTGGAGGCATATCAACTGTGGT  | CTCGGCCATATCTGGAATTGAG  | 153           |
| GAPDH        | GAAGGTGAAGGTGCGAGTC     | GAAGATGGTGATGGGATTC     | 226           |

doi:10.1371/journal.pone.0052053.t001

### Detection of 25OHD<sub>3</sub> Production

Cells from 3 donors were treated with 1000 nM vitamin D<sub>3</sub> (Sigma, St. Louis, MO, USA) for 1, 4, 12, 24 or 48 h, after which supernatants were collected, and the cells were scraped in PBS containing 0.2% Triton X-100 and stored at -80°C. Prior to use, cell lysates were sonicated on ice in a sonifier cell disrupter for 2×15 s. The levels of 25OHD<sub>3</sub> in cell supernatants and cell lysates were detected using a 25OHD<sub>3</sub> radioimmunoassay kit (DiaSorin, Stillwater, MN, USA) with a sensitivity of 1.5 ng/mL.

### Detection of 1,25OH<sub>2</sub>D<sub>3</sub> Production

Cells from 3 donors were treated with 1000 nM vitamin D<sub>3</sub> (Sigma, St. Louis, MO, USA) for 48 h and then supernatants were collected and cells were scraped in PBS containing 0.2% Triton X-100 and stored at -80°C. Prior to use, cell lysates were sonicated on ice in a sonifier cell disrupter for 2×15 s. The levels of 1,25OH<sub>2</sub>D<sub>3</sub> in cell supernatants and cell lysates were determined using a 1,25OH<sub>2</sub>D<sub>3</sub> radioimmunoassay kit (DiaSorin, Stillwater, MN, USA). The sensitivity of the assay was 2.0 pg/mL.

### RNA Interference of 25-hydroxylase

To confirm the dependence of vitamin D<sub>3</sub> conversion to 25OHD<sub>3</sub> on 25-hydroxylase, the highly specific technique of RNA interference was utilized. Cells were seeded at a density of 15000 cm<sup>-2</sup> in six-well plates. Eight hours later, the cells were transfected with either CYP27A1 siRNA (10 nM) or CYP2R1 siRNA (10 nM), or a non-silencing control siRNA using HiPerfect<sup>TM</sup> transfection reagent (Qiagen, Duesseldorf, Germany), according to the manufacturer's instructions. The target sequence of CYP27A1 siRNA was 5'-CACGCTGACATGGGCCCTGTA-3', the target sequence of CYP2R1 siRNA was 5'-TGGGTTGATCACAGACGATTA-3', and the non-silencing control was a non-homologous, scrambled sequence equivalent.

Sixty hours after transfection, cells were harvested, RNA and cDNA were obtained, and real-time PCR was performed as described earlier to test the effect of RNAi.

After confirming the effect of RNAi, 25OHD<sub>3</sub> production after RNAi was determined. Cells were first transfected with CYP27A1 siRNA (10 nM) or CYP2R1 siRNA (10 nM), or non-silencing control siRNA. Twelve hours after transfection, these cells were treated with 100 nM, 200 nM, 400 nM, 600 nM or 1000 nM

vitamin D<sub>3</sub> (Sigma, St. Louis, MO, USA) for another 12 h. Then, the 25OHD<sub>3</sub> concentrations in the cell supernatants and cell lysates were determined as described earlier.

Some other cells were first transfected with CYP27A1 siRNA (10 nM), or non-silencing control siRNA, and 12 h after transfection, these cells were treated with 1000 nM vitamin D<sub>3</sub> (Sigma, St. Louis, MO, USA) for another 48 h. Then, the 1,25OH<sub>2</sub>D<sub>3</sub> concentrations in the cell supernatants and cell lysates were detected as described earlier.

### Regulation of CYP27A1 in hGF and hPDL

Cells from four donors were seeded into six-well plates at a density of 5000 cm<sup>-2</sup> in DMEM supplemented with 10% DCC-FBS. Four days later, cells were incubated with IL-1β (PeproTech, London, UK; 1 ng/mL and 10 ng/mL), Pg-LPS (Invivogen, San Diego, CA, USA; 1 μg/mL and 10 μg/mL) or sodium butyrate (SCRC, Shanghai, China; 4 mM) for 24 h. Then mRNA expression was detected by real-time PCR as described previously.

### Statistical Methods

The Shapiro-Wilk test was used to determinate the distribution of the variants. The paired samples t-test was used to compare differences of the mRNA expression levels of CYP27A1 and CYP2R1 between hGF and hPDL, differences of 25OHD<sub>3</sub> generation by hGF and hPDL, and the effect of RNA interference. Comparison of 25OHD<sub>3</sub> generation with and without knockdown of 25-hydroxylase, and 1,25OH<sub>2</sub>D<sub>3</sub> generation with and without knockdown of CYP27A1 were also performed using a paired samples t-test. The impact of stimulation on CYP27A1 mRNA expression was analyzed using a paired-samples t-test, and the difference between CYP27A1 regulation in hGF and hPDL was analyzed using a Wilcoxon test.

Statistical analyses were accomplished using the SPSS 11.5 software package (SPSS Inc., Chicago, IL, USA). A *p* value <0.05 was considered statistically significant.

### Author Contributions

Conceived and designed the experiments: KNL HXM JXH. Performed the experiments: KNL. Analyzed the data: KNL HXM. Contributed reagents/materials/analysis tools: KNL JXH. Wrote the paper: KNL HXM JXH.

### References

- Christakos S, Dhawan P, Liu Y, Peng X, Porta A (2003) New insights into the mechanisms of vitamin D action. *J Cell Biochem* 88: 695–705.
- von EM, Kongsbak M, Schjerling P, Olgaard K, Odum N, et al. (2010) Vitamin D controls T cell antigen receptor signaling and activation of human T cells. *Nat Immunol* 11: 344–349.
- Holick MF, Clark MB (1978) The photobiogenesis and metabolism of vitamin D. *Fed Proc* 37: 2567–2574.
- Holick MF, MacLaughlin JA, Clark MB, Holick SA, Potts JJ, et al. (1980) Photosynthesis of previtamin D<sub>3</sub> in human skin and the physiologic consequences. *Science* 210: 203–205.
- Holick MF (1981) The cutaneous photosynthesis of previtamin D<sub>3</sub>: a unique photoendocrine system. *J Invest Dermatol* 77: 51–58.
- Jones G, Strugnell SA, DeLuca HF (1998) Current understanding of the molecular actions of vitamin D. *Physiol Rev* 78: 1193–1231.
- Bikle DD (2011) Vitamin D metabolism and function in the skin. *Mol Cell Endocrinol* 347: 80–89.
- Cali JJ, Russell DW (1991) Characterization of human sterol 27-hydroxylase. A mitochondrial cytochrome P-450 that catalyzes multiple oxidation reaction in bile acid biosynthesis. *J Biol Chem* 266: 7774–7778.
- Okuda K, Usui E, Ohyama Y (1995) Recent progress in enzymology and molecular biology of enzymes involved in vitamin D metabolism. *J Lipid Res* 36: 1641–1652.



10. Cheng JB, Motola DL, Mangelsdorf DJ, Russell DW (2003) De-orphanization of cytochrome P450 2R1: a microsomal vitamin D 25-hydroxylase. *J Biol Chem* 278: 38084–38093.
11. Cheng JB, Levine MA, Bell NH, Mangelsdorf DJ, Russell DW (2004) Genetic evidence that the human CYP2R1 enzyme is a key vitamin D 25-hydroxylase. *Proc Natl Acad Sci U S A* 101: 7711–7715.
12. Yamasaki T, Izumi S, Ide H, Ohyama Y (2004) Identification of a novel rat microsomal vitamin D<sub>3</sub> 25-hydroxylase. *J Biol Chem* 279: 22848–22856.
13. Gupta RP, Hollis BW, Patel SB, Patrick KS, Bell NH (2004) CYP3A4 is a human microsomal vitamin D 25-hydroxylase. *J Bone Miner Res* 19: 680–688.
14. Aiba I, Yamasaki T, Shinki T, Izumi S, Yamamoto K, et al. (2006) Characterization of rat and human CYP2J enzymes as Vitamin D 25-hydroxylases. *Steroids* 71: 849–856.
15. Bjorkhem I, Holmberg I (1978) Assay and properties of a mitochondrial 25-hydroxylase active on vitamin D<sub>3</sub>. *J Biol Chem* 253: 842–849.
16. Skrede S, Bjorkhem I, Kvittingen EA, Buchmann MS, Lie SO, et al. (1986) Demonstration of 26-hydroxylation of C27-steroids in human skin fibroblasts, and a deficiency of this activity in cerebrotendinous xanthomatosis. *J Clin Invest* 78: 729–735.
17. Cali JJ, Hsieh CL, Francke U, Russell DW (1991) Mutations in the bile acid biosynthetic enzyme sterol 27-hydroxylase underlie cerebrotendinous xanthomatosis. *J Biol Chem* 266: 7779–7783.
18. Rosen H, Reshef A, Maeda N, Lippoldt A, Shpizen S, et al. (1998) Markedly reduced bile acid synthesis but maintained levels of cholesterol and vitamin D metabolites in mice with disrupted sterol 27-hydroxylase gene. *J Biol Chem* 273: 14805–14812.
19. Lehmann B, Pietzsch J, Kampf A, Meurer M (1998) Human keratinocyte line HaCaT metabolizes 1 $\alpha$ -hydroxyvitamin D<sub>3</sub> and vitamin D<sub>3</sub> to 1 $\alpha$ ,25-dihydroxyvitamin D<sub>3</sub> (calcitriol). *J Dermatol Sci* 18: 118–127.
20. Schuessler M, Astecker N, Herzig G, Vorisek G, Schuster I (2001) Skin is an autonomous organ in synthesis, two-step activation and degradation of vitamin D(3): CYP27 in epidermis completes the set of essential vitamin D(3)-hydroxylases. *Steroids* 66: 399–408.
21. Holick MF (2007) Vitamin D deficiency. *N Engl J Med* 357: 266–281.
22. Flanagan JN, Young MV, Persons KS, Wang L, Mathieu JS, et al. (2006) Vitamin D metabolism in human prostate cells: implications for prostate cancer chemoprevention by vitamin D. *Anticancer Res* 26: 2567–2572.
23. Tang W, Norlin M, Wikvall K (2007) Regulation of human CYP27A1 by estrogens and androgens in HepG2 and prostate cells. *Arch Biochem Biophys* 462: 13–20.
24. Bjorkhem I, Andersson O, Diczfalussy U, Sevastik B, Xiu RJ, et al. (1994) Atherosclerosis and sterol 27-hydroxylase: evidence for a role of this enzyme in elimination of cholesterol from human macrophages. *Proc Natl Acad Sci U S A* 91: 8592–8596.
25. Quinn CM, Jessup W, Wong J, Kritharides L, Brown AJ (2005) Expression and regulation of sterol 27-hydroxylase (CYP27A1) in human macrophages: a role for RXR and PPAR $\gamma$  ligands. *Biochem J* 385: 823–830.
26. Hansson M, Wikvall K, Babiker A (2005) Regulation of sterol 27-hydroxylase in human monocyte-derived macrophages: up-regulation by transforming growth factor  $\beta$ 1. *Biochim Biophys Acta* 1687: 44–51.
27. Liu K, Meng H, Tang X, Xu L, Zhang L, et al. (2009) Elevated plasma calcifediol is associated with aggressive periodontitis. *J Periodontol* 80: 1114–1120.
28. Liu K, Meng H, Lu R, Xu L, Zhang L, et al. (2010) Initial periodontal therapy reduced systemic and local 25-hydroxy vitamin D(3) and interleukin-1 $\beta$  in patients with aggressive periodontitis. *J Periodontol* 81: 260–266.
29. Liu K, Meng H, Hou J (2012) Characterization of the autocrine/paracrine function of vitamin d in human gingival fibroblasts and periodontal ligament cells. *PLoS One* 7: e39878. doi:10.1371/journal.pone.0039878.
30. Bikle DD, Nemanic MK, Gee E, Elias P (1986) 1,25-Dihydroxyvitamin D<sub>3</sub> production by human keratinocytes. Kinetics and regulation. *J Clin Invest* 78: 557–566.
31. Bikle DD, Nemanic MK, Whitney JO, Elias PW (1986) Neonatal human foreskin keratinocytes produce 1,25-dihydroxyvitamin D<sub>3</sub>. *Biochemistry* 25: 1545–1548.
32. Lehmann B, Rudolph T, Pietzsch J, Meurer M (2000) Conversion of vitamin D<sub>3</sub> to 1 $\alpha$ ,25-dihydroxyvitamin D<sub>3</sub> in human skin equivalents. *Exp Dermatol* 9: 97–103.
33. Slominski A, Zjawiony J, Wortsman J, Semak I, Stewart J, et al. (2004) A novel pathway for sequential transformation of 7-dehydrocholesterol and expression of the P450 $\text{scc}$  system in mammalian skin. *Eur J Biochem* 271: 4178–4188.
34. Slominski A, Semak I, Zjawiony J, Wortsman J, Li W, et al. (2005) The cytochrome P450 $\text{scc}$  system opens an alternate pathway of vitamin D<sub>3</sub> metabolism. *FEBS J* 272: 4080–4090.
35. Tuckey RC, Li W, Zjawiony JK, Zmijewski MA, Nguyen MN, et al. (2008) Pathways and products for the metabolism of vitamin D<sub>3</sub> by cytochrome P450 $\text{scc}$ . *FEBS J* 275: 2585–2596.
36. Slominski AT, Janjetovic Z, Fuller BE, Zmijewski MA, Tuckey RC, et al. (2010) Products of vitamin D<sub>3</sub> or 7-dehydrocholesterol metabolism by cytochrome P450 $\text{scc}$  show anti-leukemia effects, having low or absent calcemic activity. *PLoS One* 5: e9907. doi:10.1371/journal.pone.0009907.
37. Kurita-Ochiai T, Ochiai K, Suzuki N, Otsuka K, Fukushima K (2002) Human gingival fibroblasts rescue butyric acid-induced T-cell apoptosis. *Infect Immun* 70: 2361–2367.
38. Li QQ, Meng HX, Gao XJ, Wang ZH (2005) Analysis of volatile fatty acids in gingival crevicular fluid of patients with chronic periodontitis. *Zhonghua Kou Qiang Yi Xue Za Zhi* 40: 208–210.
39. Lu RF, Meng HX, Gao XJ, Feng L, Xu L (2008) Analysis of short chain fatty acids in gingival crevicular fluid of patients with aggressive periodontitis. *Zhonghua Kou Qiang Yi Xue Za Zhi* 43: 664–667.
40. Darveau RP, Pham TT, Lemley K, Reife RA, Bainbridge BW, et al. (2004) Porphyromonas gingivalis lipopolysaccharide contains multiple lipid A species that functionally interact with both toll-like receptors 2 and 4. *Infect Immun* 72: 5041–5051.
41. Kocgozlu L, Elkaim R, Tenenbaum H, Werner S (2009) Variable cell responses to P. gingivalis lipopolysaccharide. *J Dent Res* 88: 741–745.
42. Hatakeyama J, Tamai R, Sugiyama A, Akashi S, Sugawara S, et al. (2003) Contrasting responses of human gingival and periodontal ligament fibroblasts to bacterial cell-surface components through the CD14/Toll-like receptor system. *Oral Microbiol Immunol* 18: 14–23.
43. Akira S, Takeda K, Kaisho T (2001) Toll-like receptors: critical proteins linking innate and acquired immunity. *Nat Immunol* 2: 675–680.
44. Mahanonda R, Pichyangkul S (2007) Toll-like receptors and their role in periodontal health and disease. *Periodontol* 2000 43: 41–55.
45. McMahon L, Schwartz K, Yilmaz O, Brown E, Ryan LK, et al. (2011) Vitamin D-mediated induction of innate immunity in gingival epithelial cells. *Infect Immun* 79: 2250–2256.
46. Garcia MN, Hildebolt CF, Miley DD, Dixon DA, Couture RA, et al. (2011) One-year effects of vitamin D and calcium supplementation on chronic periodontitis. *J Periodontol* 82: 25–32.
47. Bashutski JD, Eber RM, Kinney JS, Benavides E, Maitra S, et al. (2011) The impact of vitamin D status on periodontal surgery outcomes. *J Dent Res* 90: 1007–1012.
48. Livak KJ, Schmittgen TD (2001) Analysis of relative gene expression data using real-time quantitative PCR and the 2 $\Delta\Delta$ C $\Delta$ (T) Method. *Methods* 25: 402–408.
